# Supplementary material for: Dipolar donor–acceptor molecules in the cyanine limit for high efficiency green-light-selective organic photodiodes
Source: Royal Society of Chemistry journal article supplement (doi:10.1039/c5tc03567h), 2016-01-01
Supplement: c5tc03567h1.pdf [file c5tc03567h1.pdf]

## Supplementary Information

### **Dipolar donor-acceptor molecules in the cyanine limit for high efficiency green-light-selective organic photodiodes**

Xavier Bulliard,<sup>‡</sup> Yong Wan Jin,<sup>‡</sup> Gae Hwang Lee, Sungyoung Yun, Dong-Seok Leem, Takkyun Ro, Kyung-Bae Park, Chul-Joon Heo, Ryu-Ichi Satoh, Tadao Yagi, Yeong Suk Choi, Seon-Jeong Lim\* and Sangyoon Lee

*Organic Materials Laboratory, Samsung Advanced Institute of Technology (SAIT), Samsung Electronics, Co., Ltd., 130 Samsung-ro, Yeongtong-gu, Suwon-si, Gyeonggi-do 443-803, Republic of Korea.*

\* *E-mail: sjeong.lim@samsung.com*

<sup>‡</sup> *These authors contributed equally to this work.*

## Figures

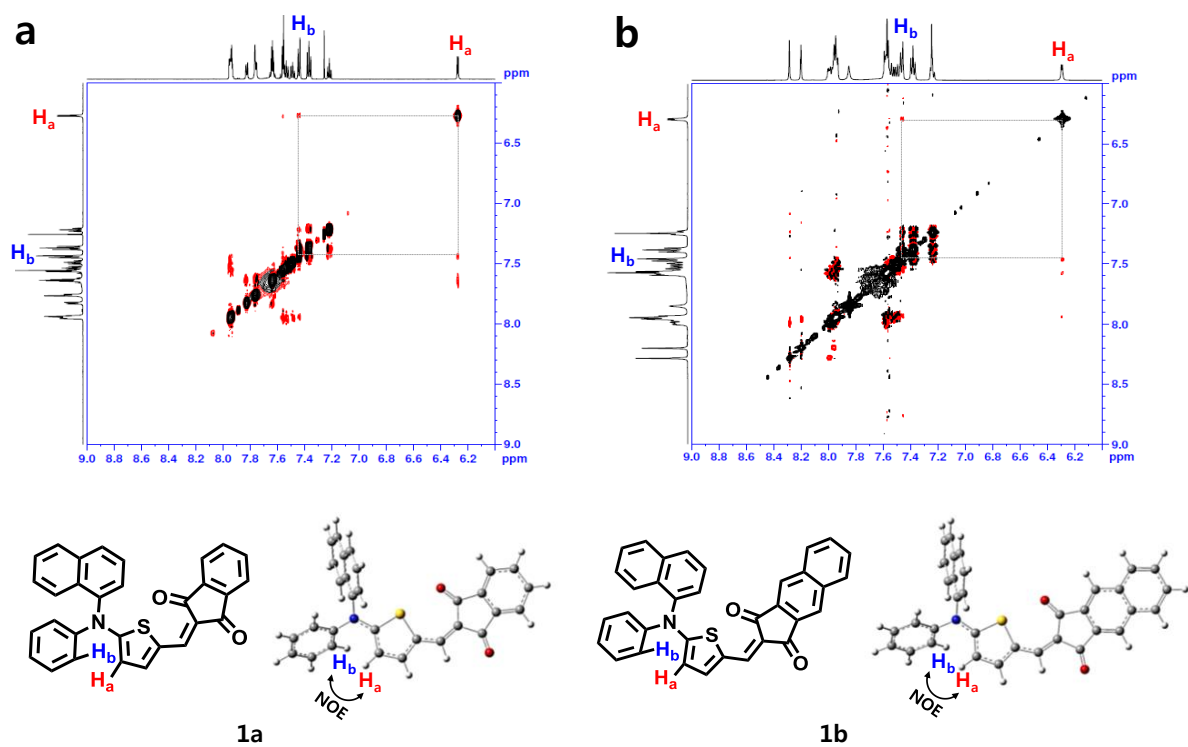

Fig. S1 Nuclear Overhauser effect spectroscopy (NOESY) spectra (600 MHz,  $CDCl_3$ ) of **1a** (a) and **1b** (b). These spectra reveal that a proton of the thiophene moiety ( $H_a$ ) shows an apparent NOE with one of the protons at the *ortho*-positions of the phenyl group ( $H_b$ ) through space correlation.

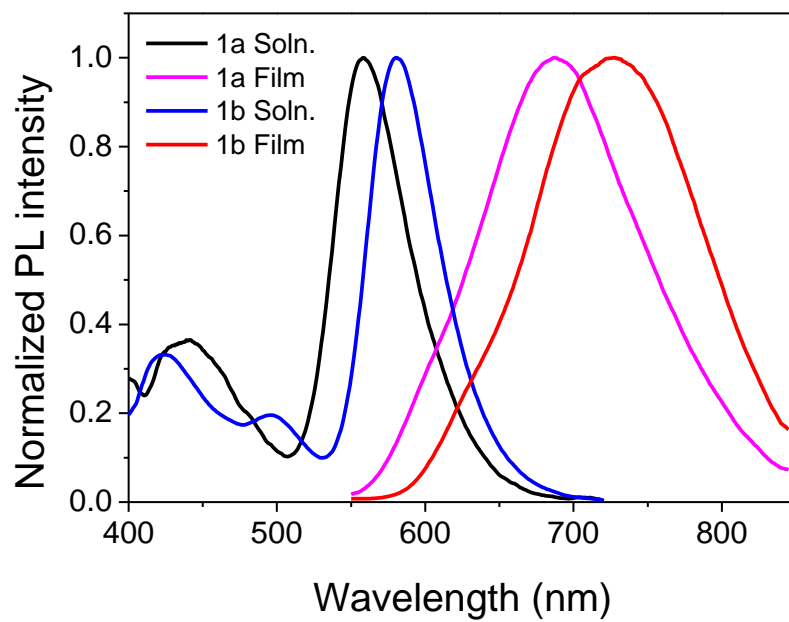

Fig. S2 Normalized photoluminescence (PL) spectra of **1a** (black line) and **1b** (blue line) dissolved in toluene solutions and of **1a** (magenta line) and **1b** (red line) in thermally-evaporated thin films.

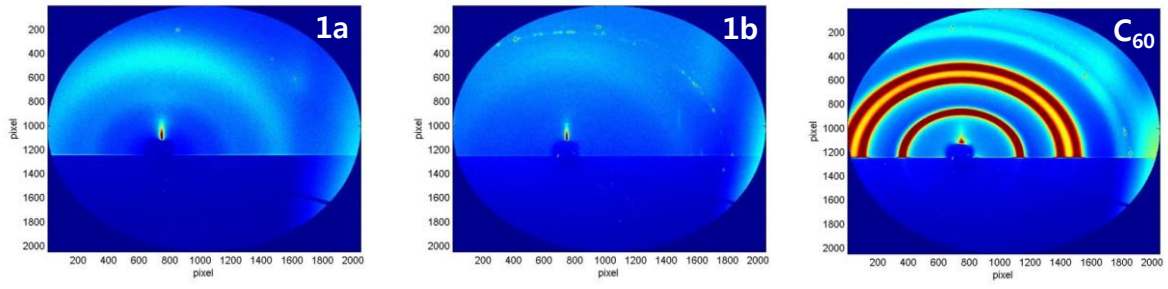

Fig. S3 GIWAXS spectra of **1a**, **1b**, and C<sub>60</sub> single thin films.

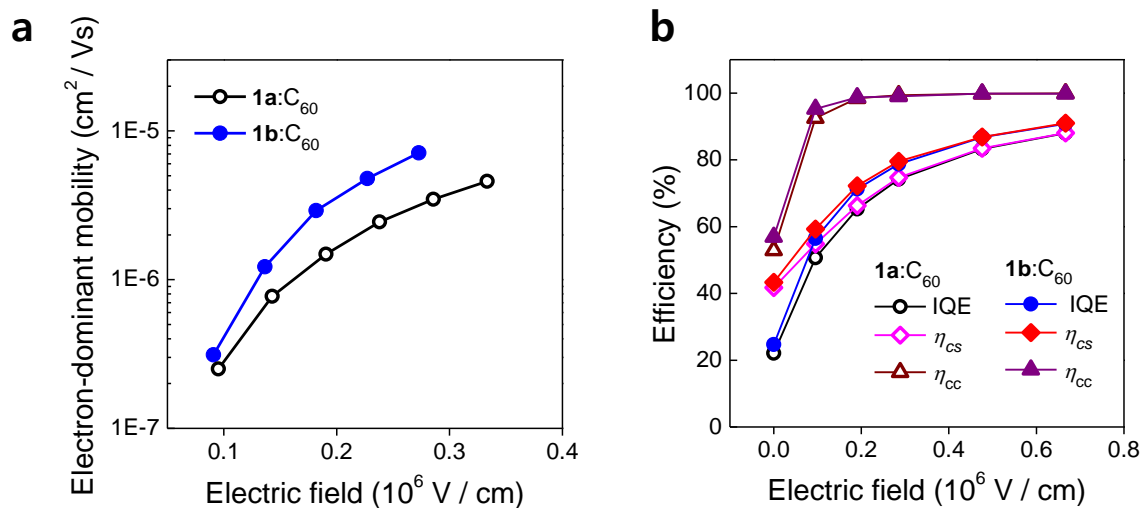

Fig. S4 (a) Electron-dominant mobility changes as a function of electric fields. (b) IQE, charge separation efficiency ( $\eta_{cs}$ ), and charge collection efficiency ( $\eta_{cc}$ ) changes as a function of electric fields. The  $\eta_{cc}$  was evaluated by using the expression  $EQE = \text{absorptance} (\eta_A) \times IQE = \eta_A \times \eta_{cs} \times \eta_{cc}$ .

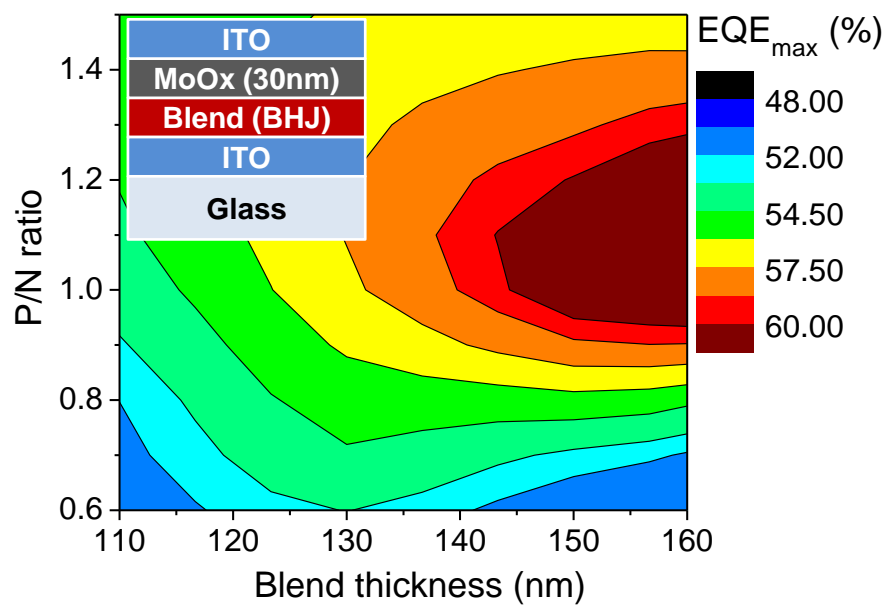

Fig. S5 Maximum EQEs of inverted-structure green-light-selective OPDs with the BHJs (**1b**:C<sub>60</sub>) of various thicknesses and mixing ratios. Inset shows the device structure.

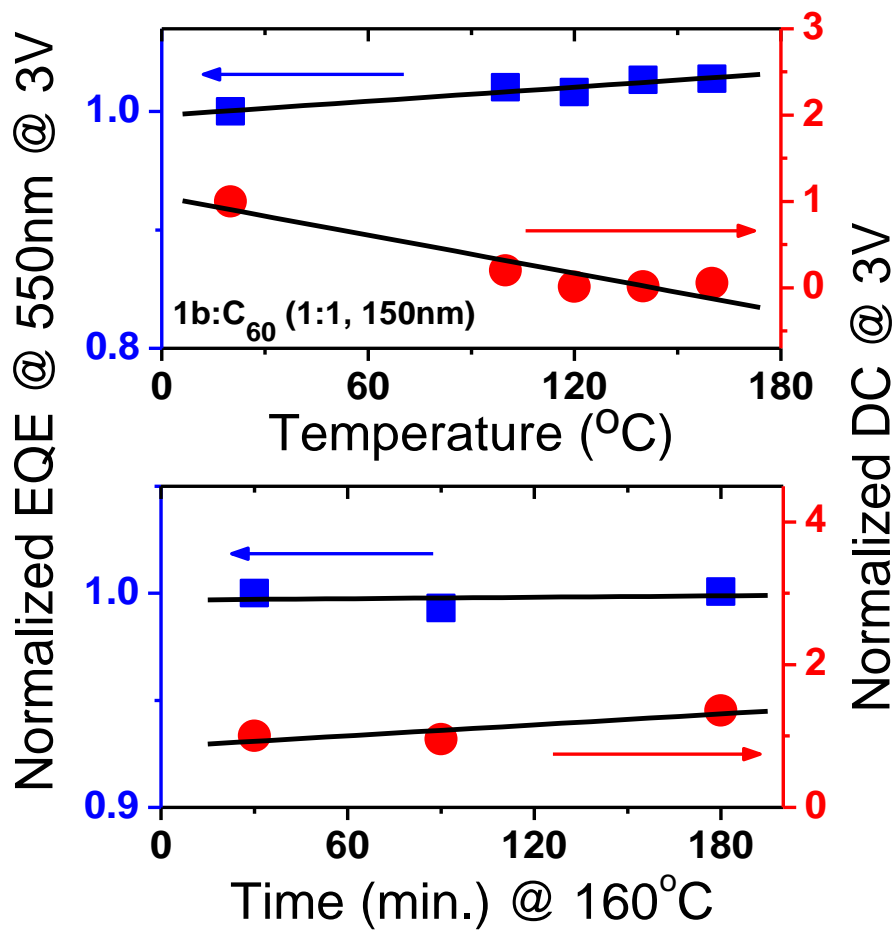

Fig. S6 Thermal stability evaluated by the changes in the EQEs and DCs with elevating temperatures of up to 160 °C for 30 min at each temperature (up-hand), in which a 2.8% increase in the  $EQE_{max}$  (62.66%) and a 94.3% drop in the DC ( $6 \text{ e/s}/\mu\text{m}^2$ ) were finally revealed at the reverse bias of 3 V, and with increasing annealing times of up to 180 min (3 hours) at the 160 °C (down-hand), in which the enhanced EQE value remained constant regardless of the thermal stresses only with a 33.3% increase in the DC ( $8 \text{ e/s}/\mu\text{m}^2$ ) under the reverse bias of 3 V.
